# Supplementary material for: PAM50 Molecular Intrinsic Subtypes in the Nurses' Health Study Cohorts
Source: Oxford University Press journal article supplement (doi:10.1158/1055-9965.epi-18-0863), 2018-12-27
Supplement: 10559965epi180863-sup-206422_2_supp_5187480_psv3wr.doc [file 10559965epi180863-sup-206422_2_supp_5187480_psv3wr.doc]

**Supplementary Table S1.** The distribution of participant, tumor, and treatment characteristics at time of breast cancer diagnosis in the Nurses’ Health Studies’ (NHS) participants with and without gene expression data.

|  | Gene Expression (*n*=954) | No Gene Expression (*n*=12,978) |
| --- | --- | --- |
| NHS Cohort, *n* (%) |  |  |
| NHS | 575 (60%) | 9,641 (75%) |
| NHS2 | 379 (40%) | 3,157 (25%) |
| Age at cancer diagnosis, mean years (sd) | 59.0 (11.5) | 59.3 (11.1) |
| Year of diagnosis, *n* (%) |  |  |
| Before 1980 | 2 (0%) | 502 (4%) |
| 1980-1989 | 10 (1%) | 2,438 (19%) |
| 1990-1994 | 191 (20%) | 1,788 (14%) |
| 1995-1999 | 278 (29%) | 2,273 (18%) |
| 2000-2004 | 319 (33%) | 2,378 (19%) |
| 2005 and Later | 154 (16%) | 3,419 (27%) |
| Tumor estrogen receptor expression, *n* (%) |  |  |
| Positive | 766 (81%) | 9,105 (80%) |
| Negative | 181 (19%) | 2,245 (20%) |
| Unknown | 7 | 1,448 |
| Tumor HER2 expression, *n* (%) |  |  |
| Positive | 241 (28%) | 1,261 (16%) |
| Negative | 635 (72%) | 6,636 (84%) |
| Unknown | 78 | 4,901 |
| Tumor grade, *n* (%) |  |  |
| 1: Predominantly well-differentiated | 228 (25%) | 2,408 (23%) |
| 2: Moderately differentiated | 441 (49%) | 4,894 (47%) |
| 3: Poorly differentiated | 234 (26%) | 3,032 (29%) |
| Unknown | 51 | 2,464 |
| Tumor stage, *n* (%) |  |  |
| I | 572 (60%) | 7,214 (56%) |
| II | 291 (31%) | 3,852 (30%) |
| III | 80 (8%) | 1,461 (11%) |
| IV | 6 (1%) | 271 (2%) |
| Unknown | 2 | 0 |
| Type of surgery received, *n* (%) |  |  |
| Lumpectomy | 413 (51%) | 3,343 (43%) |
| Mastectomy | 390 (49%) | 4,409 (57%) |
| Unknown | 151 | 5,046 |
| Receipt of chemotherapy, *n* (%) |  |  |
| Yes | 472 (59%) | 4,073 (56%) |
| No | 328 (41%) | 3,143 (44%) |
| Unknown | 154 | 5,582 |
| Receipt of radiation therapy, *n* (%) |  |  |
| Yes | 547 (66%) | 5,075 (66%) |
| No | 276 (34%) | 2,593 (34%) |
| Unknown | 131 | 5,130 |
| Receipt of hormone therapy, *n* (%) |  |  |
| Yes | 689 (82%) | 6,108 (78%) |
| No | 149 (18%) | 1,675 (22%) |
| Unknown | 116 | 5,015 |
| Body mass index, mean kg/m2 (sd) | 26.0 (5.0) | 26.3 (5.3) |
| Unknown | 26 | 1,566 |
| Physical activity, mean MET hours/week (sd) | 19.0 (20.5) | 17.7 (23.6) |
| Unknown | 14 | 3,151 |
| Smoking status, *n* (%) |  |  |
| Never | 512 (54%) | 5705 (47%) |
| Former | 359 (38%) | 4734 (39%) |
| Current | 76 (8%) | 1679 (14%) |
| Unknown | 7 | 680 |
| Menopausal status, *n* (%) |  |  |
| Premenopausal | 286 (31%) | 3,208 (28%) |
| Postmenopausal | 635 (69%) | 8,364 (72%) |
| Unknown | 33 | 1,226 |
| Menopausal hormone therapy use, *n* (%) |  |  |
| Never/Premenopausal | 433 (47%) | 5,813 (80%) |
| Former user | 152 (16%) | 2,560 (22%) |
| Current user | 343 (37%) | 3,231 (28%) |
| Unknown | 26 | 1,793 |
| Oral contraceptive use, *n* (%) |  |  |
| Ever used | 594 (63%) | 6894 (57%) |
| Never used | 353 (37%) | 5224 (43%) |
| Unknown | 7 | 680 |

Values are *n* for unknown categories

Percentages for polytomous variables may not sum to 100% due to rounding

**Supplementary Table S2**. Tumor characteristics of the 954 women from the Nurses’ Health Study (NHS) and NHSII.

|  | NHS | | NHSII | |
| --- | --- | --- | --- | --- |
|  | Tumor | Tumor-Adjacent | Tumor | Tumor-Adjacent |
| *n* | 537 | 356 | 345 | 339 |
| Age at diagnosis, mean (sd) | 66.2 (8.0) | - | 48.3 (5.7) | - |
| Year of diagnosis, n (%) |  |  |  |  |
| <1990 | 13 (2.4) | - | 1 (0.3) | - |
| ≥1990 to <2000 | 321 (59.8) | - | 115 (33.3) | - |
| ≥ 2000 | 203 (37.8) | - | 229 (66.4) | - |
| Tumor grade, *n (*%) |  |  |  |  |
| 1: Predominantly well-differentiated | 139 (25.9) | - | 72 (20.9) | - |
| 2: Moderately differentiated | 278 (51.8) | - | 164 (47.5) | - |
| 3: Poorly differentiated | 101 (18.8) | - | 92 (26.7) | - |
| Unknown | 19 (3.5) | - | 17 (4.9) | - |
| Stage, *n* (%) |  |  |  |  |
| I | 321 (59.8) | - | 207 (60.0) | - |
| II | 164 (30.5) | - | 107 (31.0) | - |
| III | 49 (9.1) | - | 26 (7.5) | - |
| IV | 3 (0.6) | - | 3 (0.9) | - |
| Unknown/No report | 0 (0.0) | - | 2 (0.6) | - |
| Tumor estrogen receptor, *n (*%) |  |  |  |  |
| Positive | 420 (78.2) | - | 289 (83.8) | - |
| Negative | 113 (21.0) | - | 55 (15.9) | - |
| Unknown | 4 (0.7) | - | 1 (0.3) | - |
| Tumor progesterone receptor, *n* (%) |  |  |  |  |
| Positive | 420 (78.2) | - | 263 (76.2) | - |
| Negative | 113 (21.0) | - | 77 (22.3) | - |
| Unknown | 4 (0.7) | - | 5 (1.4) | - |
| Tumor HER2, *n (*%) |  |  |  |  |
| Positive | 164 (30.5) | - | 60 (17.4) | - |
| Negative | 318 (59.2) | - | 276 (80.0) | - |
| Unknown | 55 (10.2) | - | 9 (2.6) | - |

**Supplementary Table S3.** Tumor PAM50 distribution (computed using subgroup-specific gene centering) in the Nurses’ Health Study (NHS)/NHSII cohorts.

|  | Luminal A | Luminal B | HER2-enriched | Basal-like | Normal-like |
| --- | --- | --- | --- | --- | --- |
| *n* | 354 | 211 | 165 | 120 | 32 |
| NHS Cohort, *n* (%) |  |  |  |  |  |
| NHS | 190 (53.7) | 136 (64.5) | 113 (68.5) | 77 (64.2) | 21 (65.6) |
| NHSII | 164 (46.3) | 75 (35.5) | 52 (31.5) | 43 (35.8) | 11 (34.4) |
| Tumor grade, *n (*%) |  |  |  |  |  |
| 1: Predominantly well-differentiated | 130 (38.0) | 41 (19.6) | 20 (13.0) | 11 (10.0) | 9 (29.0) |
| 2: Moderately differentiated | 186 (54.4) | 116 (55.5) | 90 (58.4) | 31 (28.2) | 19 (61.3) |
| 3: Poorly differentiated | 26 (7.6) | 52 (24.9) | 44 (28.6) | 68 (61.8) | 3 (9.7) |
| Stage, *n* (%) |  |  |  |  |  |
| I | 227 (64.3) | 132 (62.6) | 88 (53.3) | 59 (49.6) | 22 (68.8) |
| II | 96 (27.2) | 59 (28.0) | 54 (32.7) | 55 (46.2) | 7 (21.9) |
| III | 27 (7.6) | 19 (9.0) | 22 (13.3) | 4 (3.4) | 3 (9.4) |
| IV | 3 (0.8) | 1 (0.5) | 1 (0.6) | 1 (0.8) | 0 (0.0) |
| Tumor estrogen receptor, *n (*%) |  |  |  |  |  |
| Positive | 342 (97.2) | 202 (96.2) | 105 (64.0) | 36 (30.3) | 24 (75.0) |
| Negative | 10 (2.8) | 8 (3.8) | 59 (36.0) | 83 (69.7) | 8 (25.0) |
| Tumor progesterone receptor, *n* (%) |  |  |  |  |  |
| Positive | 335 (95.7) | 193 (91.9) | 99 (60.7) | 32 (27.1) | 24 (75.0) |
| Negative | 15 (4.3) | 17 (8.1) | 64 (39.3) | 86 (72.9) | 8 (25.0) |
| Tumor HER2, *n (*%) |  |  |  |  |  |
| Positive | 82 (24.6) | 51 (26.7) | 68 (44.4) | 19 (17.3) | 4 (13.3) |
| Negative | 252 (75.4) | 140 (73.3) | 85 (55.6) | 91 (82.7) | 26 (86.7) |
| Tumor Ki-67, *n* (%) |  |  |  |  |  |
| High | 24 (20.7) | 34 (39.1) | 28 (37.3) | 25 (53.2) | 2 (16.7) |
| Low | 92 (79.3) | 53 (60.9) | 47 (62.7) | 22 (46.8) | 10 (83.3) |

**Supplementary Table S4A**. The association of PAM50 subtypes and risk of relapse with proliferation and tumor size weighted (ROR-PT) scores (computed using modified median gene centering) with recurrence-free or distant recurrence-free survival within 5 and 10 years in 390 women diagnosed *before 1999* (before trastuzumab therapy was introduced).

|  | **5-years** | | | | **10-years** | | | |
| --- | --- | --- | --- | --- | --- | --- | --- | --- |
|  | Event *n*/  Total *n* | HR | (95% CI) | P-Value | Event *n*/  Total *n* | HR | (95% CI) | P-Value |
| **Recurrence-free survival** | | | | |  |  |  |  |
| **A. Crude** |  |  |  |  |  |  |  |  |
| Luminal A | 5/142 | 1.00 | ref | - | 16/142 | 1.00 | ref | - |
| Luminal B | 7/58 | 3.70 | (1.17,11.65) | **0.03** | 13/58 | 2.12 | (1.02,4.41) | **0.04** |
| HER2-enriched | 12/71 | 5.13 | (1.81,14.58) | **<0.01** | 15/71 | 1.98 | (0.98,4.00) | 0.06 |
| Basal-like | 8/80 | 2.99 | (0.98,9.14) | 0.05 | 14/80 | 1.61 | (0.78,3.29) | 0.19 |
| Normal-like | 4/39 | 3.00 | (0.81,11.19) | 0.10 | 8/39 | 1.88 | (0.80,4.39) | 0.15 |
|  |  |  |  |  |  |  |  |  |
| ROR-PT score* | 35/377 | 1.24 | (1.06,1.46) | **0.01** | 63/377 | 1.17 | (1.04,1.32) | **0.01** |
| **B. Adjusted Model**# | |  |  |  |  |  |  |  |
| Luminal A | 5/142 | 1.00 | ref | - | 16/142 | 1.00 | ref | - |
| Luminal B | 7/58 | 4.50 | (1.33,15.23) | **0.02** | 13/58 | 2.44 | (1.11,5.38) | **0.03** |
| HER2-enriched | 12/71 | 4.70 | (1.55,14.25) | **0.01** | 15/71 | 2.00 | (0.94,4.25) | 0.07 |
| Basal-like | 8/80 | 3.66 | (1.05,12.71) | **0.04** | 14/80 | 1.96 | (0.87,4.41) | 0.10 |
| Normal-like | 4/39 | 3.47 | (0.90,13.44) | 0.07 | 8/39 | 2.38 | (0.99,5.73) | 0.05 |
|  |  |  |  |  |  |  |  |  |
| ROR-PT score* | 35/377 | 1.17 | (0.96,1.42) | 0.12 | 63/377 | 1.12 | (0.97,1.28) | 0.13 |
| **Distant recurrence-free survival** | | | | |  |  |  |  |
| **A. Crude** |  |  |  |  |  |  |  |  |
| Luminal A | 4/142 | 1.00 | ref | - | 11/142 | 1.00 | ref | - |
| Luminal B | 4/58 | 2.54 | (0.63,10.15) | 0.19 | 10/58 | 2.28 | (0.97,5.37) | 0.06 |
| HER2-enriched | 11/71 | 5.86 | (1.87,18.41) | **<0.01** | 13/71 | 2.49 | (1.12,5.57) | **0.03** |
| Basal-like | 5/80 | 2.29 | (0.61,8.51) | 0.22 | 8/80 | 1.3 | (0.52,3.23) | 0.57 |
| Normal-like | 3/39 | 2.79 | (0.63,12.48) | 0.18 | 6/39 | 2.02 | (0.75,5.46) | 0.17 |
|  |  |  |  |  |  |  |  |  |
| ROR-PT score* | 26/377 | 1.34 | (1.11,1.62) | **<0.01** | 46/377 | 1.19 | (1.03,1.37) | **0.01** |
| **B. Adjusted Model**# | |  |  |  |  |  |  |  |
| Luminal A | 4/142 | 1.00 | ref | - | 11/142 | 1.00 | ref | - |
| Luminal B | 4/58 | 3.66 | (0.80,16.78) | 0.10 | 10/58 | 2.65 | (1.05,6.67) | **0.04** |
| HER2-enriched | 11/71 | 5.56 | (1.54,20.07) | **0.01** | 13/71 | 2.32 | (0.98,5.51) | 0.06 |
| Basal-like | 5/80 | 3.30 | (0.71,15.27) | 0.13 | 8/80 | 1.68 | (0.60,4.71) | 0.32 |
| Normal-like | 3/39 | 3.75 | (0.76,18.39) | 0.10 | 6/39 | 2.43 | (0.87,6.74) | 0.09 |
|  |  |  |  |  |  |  |  |  |
| ROR-PT score* | 26/377 | 1.24 | (0.98,1.58) | 0.08 | 46/377 | 1.12 | (0.95,1.33) | 0.18 |

*ROR-PT was evaluated as continuous variable per 10-unit change in 377 women with ROR-PT scores. #Adjusted model included age and year of diagnosis, clinical grade, stage, type of surgery, and type of treatment. Hazard Ratio, HR.

**Supplementary Table S4B. The association of PAM50 subtypes and risk of relapse with proliferation and tumor size weighted (ROR-PT) scores (computed using modified median gene centering) with recurrence-free or distant recurrence-free survival within 5 and 10 years in 486 women diagnosed *during or after 1999* (when trastuzumab therapy was introduced).**

|  | **5-years** | | | | **10-years** | | | |
| --- | --- | --- | --- | --- | --- | --- | --- | --- |
|  | Event *n*/  Total *n* | HR | (95% CI) | P-Value | Event *n*/  Total *n* | HR | (95% CI) | P-Value |
| **Recurrence-free survival** | | | | |  |  |  |  |
| **A. Crude** |  |  |  |  |  |  |  |  |
| Luminal A | 14/260 | 1.00 | ref | - | 20/260 | 1.00 | ref | - |
| Luminal B | 6/99 | 1.14 | (0.44,2.96) | 0.79 | 9/99 | 1.21 | (0.55,2.66) | 0.63 |
| HER2-enriched | 6/51 | 2.32 | (0.89,6.04) | 0.08 | 7/51 | 1.94 | (0.82,4.58) | 0.13 |
| Basal-like | 5/47 | 2.07 | (0.75,5.75) | 0.16 | 7/47 | 2.02 | (0.86,4.78) | 0.11 |
| Normal-like | 3/29 | 2.00 | (0.58,6.97) | 0.27 | 3/29 | 1.39 | (0.41,4.69) | 0.59 |
|  |  |  |  |  |  |  |  |  |
| ROR-PT score* | 33/480 | 1.24 | (1.05,1.45) | **0.01** | 45/480 | 1.17 | (1.02,1.34) | **0.03** |
| **B. Adjusted Model**# | |  |  |  |  |  |  |  |
| Luminal A | 14/260 | 1.00 | ref | - | 20/260 | 1.00 | ref | - |
| Luminal B | 6/99 | 0.83 | (0.29,2.33) | 0.72 | 9/99 | 1.01 | (0.43,2.37) | 0.98 |
| HER2-enriched | 6/51 | 2.11 | (0.73,6.09) | 0.17 | 7/51 | 1.9 | (0.75,4.79) | 0.18 |
| Basal-like | 5/47 | 2.08 | (0.61,7.07) | 0.24 | 7/47 | 2.15 | (0.77,5.99) | 0.14 |
| Normal-like | 3/29 | 1.16 | (0.26,5.29) | 0.84 | 3/29 | 0.92 | (0.21,3.98) | 0.91 |
|  |  |  |  |  |  |  |  |  |
| ROR-PT score* | 33/480 | 1.03 | (0.84,1.27) | 0.76 | 45/480 | 1.02 | (0.85,1.21) | 0.86 |
| **Distant recurrence-free survival** | | | | |  |  |  |  |
| **A. Crude** |  |  |  |  |  |  |  |  |
| Luminal A | 13/260 | 1.00 | ref | - | 14/260 | 1.00 | ref | - |
| Luminal B | 5/99 | 1.01 | (0.36,2.84) | 0.98 | 8/99 | 1.53 | (0.64,3.64) | 0.34 |
| HER2-enriched | 5/51 | 2.08 | (0.74,5.82) | 0.17 | 5/51 | 1.95 | (0.70,5.41) | 0.20 |
| Basal-like | 4/47 | 1.77 | (0.58,5.43) | 0.32 | 7/47 | 2.88 | (1.16,7.14) | **0.02** |
| Normal-like | 3/29 | 2.16 | (0.61,7.57) | 0.23 | 3/29 | 2 | (0.57,6.96) | 0.28 |
|  |  |  |  |  |  |  |  |  |
| ROR-PT score* | 29/480 | 1.25 | (1.06,1.49) | **0.01** | 36/480 | 1.24 | (1.07,1.45) | **0.01** |
| **B. Adjusted Model**# | |  |  |  |  |  |  |  |
| Luminal A | 13/260 | 1.00 | ref | - | 14/260 | 1.00 | ref | - |
| Luminal B | 5/99 | 0.75 | (0.25,2.26) | 0.60 | 8/99 | 1.28 | (0.50,3.26) | 0.60 |
| HER2-enriched | 5/51 | 1.89 | (0.60,5.90) | 0.27 | 5/51 | 1.96 | (0.66,5.87) | 0.23 |
| Basal-like | 4/47 | 1.78 | (0.47,6.79) | 0.40 | 7/47 | 3.56 | (1.19,10.67) | **0.02** |
| Normal-like | 3/29 | 1.23 | (0.27,5.66) | 0.79 | 3/29 | 1.27 | (0.28,5.73) | 0.76 |
|  |  |  |  |  |  |  |  |  |
| ROR-PT score* | 29/480 | 1.08 | (0.87,1.34) | 0.50 | 36/480 | 1.08 | (0.89,1.31) | 0.42 |

*ROR-PT was evaluated as continuous variable per 10-unit change in 480 women with ROR-PT scores. #Adjusted model included age and year of diagnosis, clinical grade, stage, type of surgery, and type of treatment. Hazard Ratio, HR.

**Supplementary Table S5A**. The association of PAM50 subtypes and risk of relapse with proliferation and tumor size weighted (ROR-PT) scores (computed using subgroup-specific gene centering) with recurrence-free survival within 5 and 10 years in the Nurses’ Health Study (NHS)/NHSII cohorts.

|  | **5-years** | | | | **10-years** | | | |
| --- | --- | --- | --- | --- | --- | --- | --- | --- |
|  | Event *n*/ Total *n* | HR | (95% CI) | P-Value | Event *n*/ Total *n* | HR | (95% CI) | P-Value |
| **A. Crude** |  |  |  |  |  |  |  |  |
| Luminal A | 17/351 | 1.00 | ref | - | 31/351 | 1.00 | ref | - |
| Luminal B | 16/211 | 1.61 | (0.81,3.19) | 0.17 | 27/211 | 1.49 | (0.89,2.50) | 0.13 |
| HER2-enriched | 24/163 | 3.26 | (1.75,6.07) | **<0.01** | 31/163 | 2.31 | (1.41,3.80) | **<0.01** |
| Basal-like | 10/119 | 1.79 | (0.82,3.90) | 0.14 | 19/119 | 1.86 | (1.05,3.29) | **0.03** |
| Normal-like | 3/32 | 1.95 | (0.57,6.65) | 0.29 | 4/32 | 1.43 | (0.51,4.05) | 0.50 |
|  |  |  |  |  |  |  |  |  |
| ROR-PT score* | 70/857 | 1.26 | (1.13,1.41) | **<0.01** | 112/857 | 1.21 | (1.10,1.32) | **<0.01** |
| **B. Adjusted Model**# | |  |  |  |  |  |  |  |
| Luminal A | 17/351 | 1.00 | ref | - | 31/351 | 1.00 | ref | - |
| Luminal B | 16/211 | 1.51 | (0.74,3.06) | 0.26 | 27/211 | 1.41 | (0.82,2.42) | 0.21 |
| HER2-enriched | 24/163 | 2.63 | (1.34,5.15) | **<0.01** | 31/163 | 1.99 | (1.16,3.41) | **0.01** |
| Basal-like | 10/119 | 1.79 | (0.74,4.30) | 0.19 | 19/119 | 1.75 | (0.91,3.35) | 0.09 |
| Normal-like | 3/32 | 1.68 | (0.48,5.88) | 0.41 | 4/32 | 1.30 | (0.45,3.74) | 0.62 |
|  |  |  |  |  |  |  |  |  |
| ROR-PT score* | 70/857 | 1.10 | (0.96,1.26) | 0.18 | 112/857 | 1.07 | (0.96,1.19) | 0.24 |

*ROR-PT was evaluated as continuous variable per 10-unit change in 857 women with ROR-PT scores. #Adjusted model included age and year of diagnosis, clinical grade, stage, type of surgery, and type of treatment. Hazard Ratio, HR.

**Supplementary Table S5B**. The association of PAM50 subtypes and risk of relapse with proliferation and tumor size weighted (ROR-PT) scores (computed using subgroup-specific gene centering) with distant recurrence-free survival within 5 and 10 years in the Nurses’ Health Study (NHS)/NHSII cohorts.

|  | **5-years** | | | | **10-years** | | | |
| --- | --- | --- | --- | --- | --- | --- | --- | --- |
|  | Event *n*/ Total *n* | HR | (95% CI) | P-Value | Event *n*/ Total *n* | HR | (95% CI) | P-Value |
| **A. Crude** |  |  |  |  |  |  |  |  |
| Luminal A | 14/351 | 1.00 | ref | - | 21/351 | 1.00 | ref | - |
| Luminal B | 12/211 | 1.45 | (0.67,3.13) | 0.35 | 21/211 | 1.69 | (0.93,3.10) | 0.09 |
| HER2-enriched | 21/163 | 3.43 | (1.75,6.75) | **<0.01** | 25/163 | 2.73 | (1.53,4.87) | **<0.01** |
| Basal-like | 7/119 | 1.51 | (0.61,3.73) | 0.38 | 14/119 | 1.99 | (1.01,3.92) | **<0.05** |
| Normal-like | 3/32 | 2.36 | (0.68,8.21) | 0.18 | 4/32 | 2.13 | (0.73,6.20) | 0.17 |
|  |  |  |  |  |  |  |  |  |
| ROR-PT score* | 57/857 | 1.31 | (1.16,1.49) | **<0.01** | 85/857 | 1.25 | (1.13,1.39) | **<0.01** |
| **B. Adjusted Model#** | |  |  |  |  |  |  |  |
| Luminal A | 14/351 | 1.00 | ref | - | 21/351 | 1.00 | ref | - |
| Luminal B | 12/211 | 1.37 | (0.61,3.08) | 0.45 | 21/211 | 1.59 | (0.85,2.99) | 0.15 |
| HER2-enriched | 21/163 | 2.74 | (1.30,5.77) | **0.01** | 25/163 | 2.28 | (1.22,4.27) | **0.01** |
| Basal-like | 7/119 | 1.65 | (0.59,4.56) | 0.34 | 14/119 | 2.09 | (0.97,4.49) | 0.06 |
| Normal-like | 3/32 | 1.97 | (0.55,7.10) | 0.30 | 4/32 | 1.80 | (0.61,5.33) | 0.29 |
|  |  |  |  |  |  |  |  |  |
| ROR-PT score* | 57/857 | 1.16 | (1.00,1.36) | 0.06 | 85/857 | 1.11 | (0.98,1.26) | 0.10 |

*ROR-PT was evaluated as continuous variable per 10-unit change in 857 women with ROR-PT scores. #Adjusted model included age and year of diagnosis, clinical grade, stage, type of surgery, and type of treatment. Hazard Ratio, HR.

**Supplementary Table S5C**. The association of PAM50 subtypes and risk of relapse with proliferation and tumor size weighted (ROR-PT) scores (computed using subgroup-specific gene centering) with recurrence-free or distant recurrence-free survival within 5 and 10 years in 390 women diagnosed *before 1999* (before trastuzumab therapy was introduced).

|  | **5-years** | | | | **10-years** | | | |
| --- | --- | --- | --- | --- | --- | --- | --- | --- |
|  | Event *n*/  Total *n* | HR | (95% CI) | P-Value | Event *n*/  Total *n* | HR | (95% CI) | P-Value |
| **Recurrence-free survival** | | | | |  |  |  |  |
| **A. Crude** |  |  |  |  |  |  |  |  |
| Luminal A | 4/121 | 1.00 | ref | - | 13/121 | 1.00 | ref | - |
| Luminal B | 10/86 | 3.77 | (1.18,12.03) | **0.02** | 17/86 | 1.97 | (0.96,4.06) | 0.07 |
| HER2-enriched | 15/96 | 5.06 | (1.68,15.26) | **<0.01** | 21/96 | 2.17 | (1.09,4.33) | **0.03** |
| Basal-like | 5/73 | 2.13 | (0.57,7.93) | 0.26 | 12/73 | 1.55 | (0.71,3.39) | 0.28 |
| Normal-like | 2/14 | 4.53 | (0.83,24.76) | 0.08 | 3/14 | 2.14 | (0.61,7.51) | 0.24 |
|  |  |  |  |  |  |  |  |  |
| ROR-PT score* | 35/377 | 1.25 | (1.06,1.48) | **0.01** | 63/377 | 1.18 | (1.04,1.33) | **0.01** |
| **B. Adjusted Model**# | |  |  |  |  |  |  |  |
| Luminal A | 4/121 | 1.00 | ref | - | 13/121 | 1.00 | ref | - |
| Luminal B | 10/86 | 4.71 | (1.40,15.81) | **0.01** | 17/86 | 2.49 | (1.16,5.36) | **0.02** |
| HER2-enriched | 15/96 | 5.17 | (1.63,16.42) | **0.01** | 21/96 | 2.58 | (1.23,5.39) | **0.01** |
| Basal-like | 5/73 | 2.51 | (0.61,10.35) | 0.20 | 12/73 | 2.01 | (0.84,4.78) | 0.12 |
| Normal-like | 2/14 | 4.47 | (0.79,25.37) | 0.09 | 3/14 | 2.47 | (0.69,8.94) | 0.17 |
|  |  |  |  |  |  |  |  |  |
| ROR-PT score* | 35/377 | 1.17 | (0.95,1.43) | 0.13 | 63/377 | 1.12 | (0.97,1.29) | 0.13 |
| **Distant recurrence-free survival** | | | | |  |  |  |  |
| **A. Crude** |  |  |  |  |  |  |  |  |
| Luminal A | 2/121 | 1.00 | ref | - | 8/121 | 1.00 | ref | - |
| Luminal B | 7/86 | 5.15 | (1.07,24.77) | **0.04** | 13/86 | 2.4 | (0.99,5.78) | 0.05 |
| HER2-enriched | 13/96 | 8.67 | (1.96,38.42) | **<0.01** | 17/96 | 2.83 | (1.22,6.57) | **0.02** |
| Basal-like | 3/73 | 2.53 | (0.42,15.17) | 0.31 | 7/73 | 1.44 | (0.52,3.98) | 0.48 |
| Normal-like | 2/14 | 8.98 | (1.26,63.73) | **0.03** | 3/14 | 3.52 | (0.93,13.27) | 0.06 |
|  |  |  |  |  |  |  |  |  |
| ROR-PT score* | 26/377 | 1.38 | (1.13,1.68) | **<0.01** | 46/377 | 1.21 | (1.05,1.39) | **0.01** |
| **B. Adjusted Model**# | |  |  |  |  |  |  |  |
| Luminal A | 2/121 | 1.00 | ref | - | 8/121 | 1.00 | ref | - |
| Luminal B | 7/86 | 9.58 | (1.63,56.32) | **0.01** | 13/86 | 3.06 | (1.21,7.76) | **0.02** |
| HER2-enriched | 13/96 | 11.02 | (2.06,58.93) | **0.01** | 17/96 | 3.07 | (1.26,7.46) | **0.01** |
| Basal-like | 3/73 | 4.34 | (0.57,33.02) | 0.16 | 7/73 | 1.95 | (0.64,5.96) | 0.24 |
| Normal-like | 2/14 | 10.8 | (1.36,86.04) | **0.02** | 3/14 | 3.93 | (1.02,15.20) | **<0.05** |
|  |  |  |  |  |  |  |  |  |
| ROR-PT score* | 26/377 | 1.25 | (0.97,1.60) | 0.08 | 46/377 | 1.13 | (0.95,1.34) | 0.17 |

*ROR-PT was evaluated as continuous variable per 10-unit change in 377 women with ROR-PT scores. #Adjusted model included age and year of diagnosis, clinical grade, stage, type of surgery, and type of treatment. Hazard Ratio, HR.

**Supplementary Table S5D**. The association of PAM50 subtypes and risk of relapse with proliferation and tumor size weighted (ROR-PT) scores (computed using subgroup-specific gene centering) with recurrence-free or distant recurrence-free survival within 5 and 10 years in 486 women diagnosed *during or after 1999* (when trastuzumab therapy was introduced).

|  | **5-years** | | | | **10-years** | | | |
| --- | --- | --- | --- | --- | --- | --- | --- | --- |
|  | Event *n*/  Total *n* | HR | (95% CI) | P-Value | Event *n*/  Total *n* | HR | (95% CI) | P-Value |
| **Recurrence-free survival** | | | | |  |  |  |  |
| **A. Crude** |  |  |  |  |  |  |  |  |
| Luminal A | 13/230 | 1.00 | ref | - | 18/230 | 1.00 | ref | - |
| Luminal B | 6/125 | 0.85 | (0.32,2.24) | 0.74 | 10/125 | 1.03 | (0.48,2.23) | 0.94 |
| HER2-enriched | 9/67 | 2.58 | (1.10,6.04) | **0.03** | 10/67 | 2.09 | (0.97,4.54) | 0.06 |
| Basal-like | 5/46 | 2.02 | (0.72,5.67) | 0.18 | 7/46 | 2.03 | (0.85,4.85) | 0.11 |
| Normal-like | 1/18 | 0.97 | (0.13,7.41) | 0.98 | 1/18 | 0.70 | (0.09,5.27) | 0.73 |
|  |  |  |  |  |  |  |  |  |
| ROR-PT score* | 33/480 | 1.26 | (1.07,1.48) | **0.01** | 45/480 | 1.18 | (1.03,1.36) | **0.02** |
| **B. Adjusted Model**# | |  |  |  |  |  |  |  |
| Luminal A | 13/230 | 1.00 | ref | - | 18/230 | 1.00 | ref | - |
| Luminal B | 6/125 | 0.62 | (0.22,1.76) | 0.37 | 10/125 | 0.85 | (0.37,1.96) | 0.71 |
| HER2-enriched | 9/67 | 1.47 | (0.55,3.98) | 0.44 | 10/67 | 1.48 | (0.62,3.53) | 0.38 |
| Basal-like | 5/46 | 1.60 | (0.48,5.35) | 0.45 | 7/46 | 1.87 | (0.67,5.22) | 0.23 |
| Normal-like | 1/18 | 0.79 | (0.10,6.33) | 0.82 | 1/18 | 0.61 | (0.08,4.67) | 0.63 |
|  |  |  |  |  |  |  |  |  |
| ROR-PT score* | 33/480 | 1.04 | (0.85,1.28) | 0.70 | 45/480 | 1.02 | (0.86,1.22) | 0.79 |
| **Distant recurrence-free survival** | | | | |  |  |  |  |
| **A. Crude** |  |  |  |  |  |  |  |  |
| Luminal A | 12/230 | 1.00 | ref | - | 13/230 | 1.00 | ref | - |
| Luminal B | 5/125 | 0.77 | (0.27,2.17) | 0.62 | 8/125 | 1.14 | (0.47,2.74) | 0.78 |
| HER2-enriched | 8/67 | 2.48 | (1.01,6.07) | **<0.05** | 8/67 | 2.30 | (0.95,5.56) | 0.06 |
| Basal-like | 4/46 | 1.74 | (0.56,5.38) | 0.34 | 7/46 | 2.80 | (1.12,7.02) | **0.03** |
| Normal-like | 1/18 | 1.05 | (0.14,8.09) | 0.96 | 1/18 | 0.97 | (0.13,7.45) | 0.98 |
|  |  |  |  |  |  |  |  |  |
| ROR-PT score* | 29/480 | 1.28 | (1.08,1.52) | **<0.01** | 36/480 | 1.26 | (1.08,1.47) | **<0.01** |
| **B. Adjusted Model**# | |  |  |  |  |  |  |  |
| Luminal A | 12/230 | 1.00 | ref | - | 13/230 | 1.00 | ref | - |
| Luminal B | 5/125 | 0.56 | (0.18,1.74) | 0.32 | 8/125 | 0.95 | (0.37,2.45) | 0.92 |
| HER2-enriched | 8/67 | 1.39 | (0.49,3.99) | 0.54 | 8/67 | 1.51 | (0.56,4.13) | 0.42 |
| Basal-like | 4/46 | 1.37 | (0.37,5.12) | 0.64 | 7/46 | 2.78 | (0.94,8.19) | 0.06 |
| Normal-like | 1/18 | 0.88 | (0.11,7.13) | 0.9 | 1/18 | 0.86 | (0.11,6.79) | 0.88 |
|  |  |  |  |  |  |  |  |  |
| ROR-PT score* | 29/480 | 1.09 | (0.88,1.36) | 0.42 | 36/480 | 1.09 | (0.90,1.32) | 0.38 |

*ROR-PT was evaluated as continuous variable per 10-unit change in 480 women with ROR-PT scores. #Adjusted model included age and year of diagnosis, clinical grade, stage, type of surgery, and type of treatment. Hazard Ratio, HR.
