# Supplementary material for: PAM50 Molecular Intrinsic Subtypes in the Nurses' Health Study Cohorts
Source: Oxford University Press journal article supplement (doi:10.1158/1055-9965.epi-18-0863), 2018-12-27
Supplement: 10559965epi180863-sup-206422_2_supp_5187485_p1v3wr.docx [file 10559965epi180863-sup-206422_2_supp_5187485_p1v3wr.docx]

**Comparison of PAM50 and IHC surrogates among women with Ki-67 IHC data (n=337)**

A. Table displaying the correlation between Luminal A, Luminal B, HER2-enriched and Basal-like as classified by PAM50 (using modified median gene centering) and IHC surrogates (accuracy = 0.50, kappa = 0.29)

B. Table displaying the correlation Luminal A, Luminal B, HER2-enriched and Basal-like as classified by PAM50 (using subgroup-specific gene centering) and IHC surrogates (accuracy = 0.49, kappa = 0.29)

C. Table displaying the correlation between Luminal A/B, HER2-enriched and Basal-like as classified by PAM50 (using modified median gene centering) and IHC surrogates (accuracy = 0.81, kappa = 0.53)

D. Table displaying the correlation between Luminal A/B, HER2-enriched and Basal-like as classified by PAM50 (using subgroup-specific gene centering) and IHC surrogates (accuracy = 0.79, kappa = 0.49)
